# Supplementary material for: TOUCAN: a framework for fungal biosynthetic gene cluster discovery
Source: PubMed Central journal article supplement — NAR Genom Bioinform. 2020 Nov 27;2(4):lqaa098. doi: 10.1093/nargab/lqaa098 (PMC7694738; doi:10.1093/nargab/lqaa098), 2020-11-27
Supplement: lqaa098_supplemental_file.pdf [file lqaa098_supplemental_file.pdf]

Supplementary Figure 1: Presence of Pfam protein domains annotated as *high* (usually present in BGCs) and *medium* (usually present, but not limited to BGCs) in our dataset positive instances. Each positive instance in our datasets is represented in a row. The columns represent the absence or presence of a *high* or *medium* Pfam protein domains, sorted by occurrence. The distribution of *high* and *medium* protein domains among positive instances shows that a structural pattern is shared by different BGC IDs.

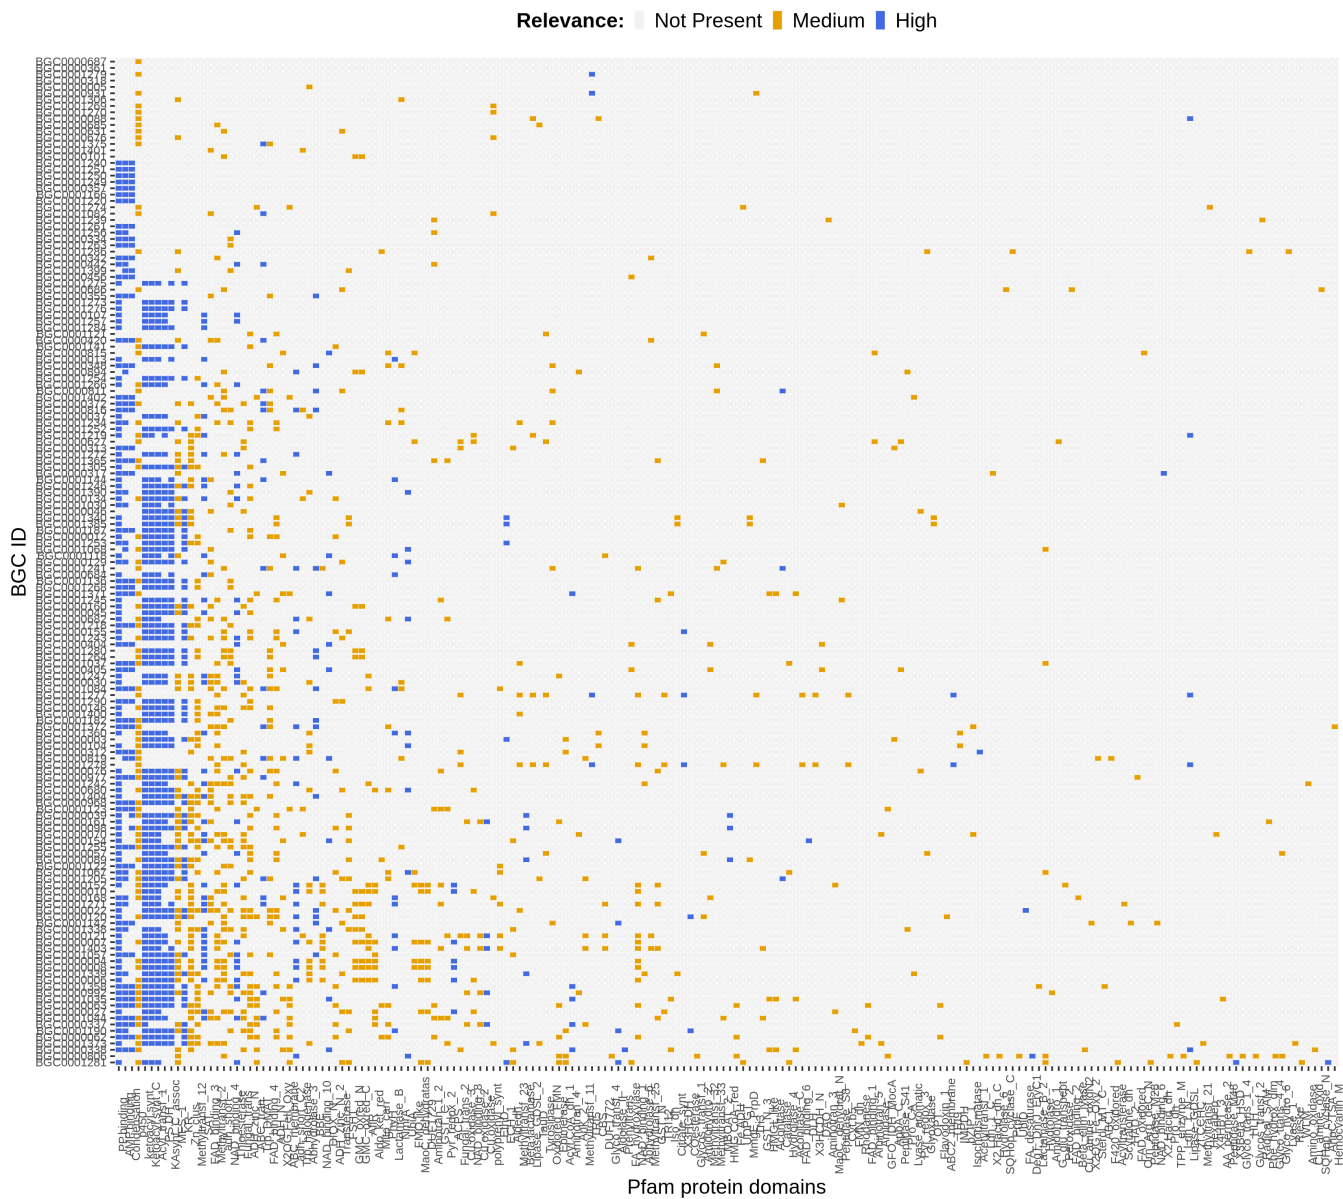

Supplementary Figure 2: P, R, and F-m for classifiers on each validation set for  $3 \leq K \leq 9$

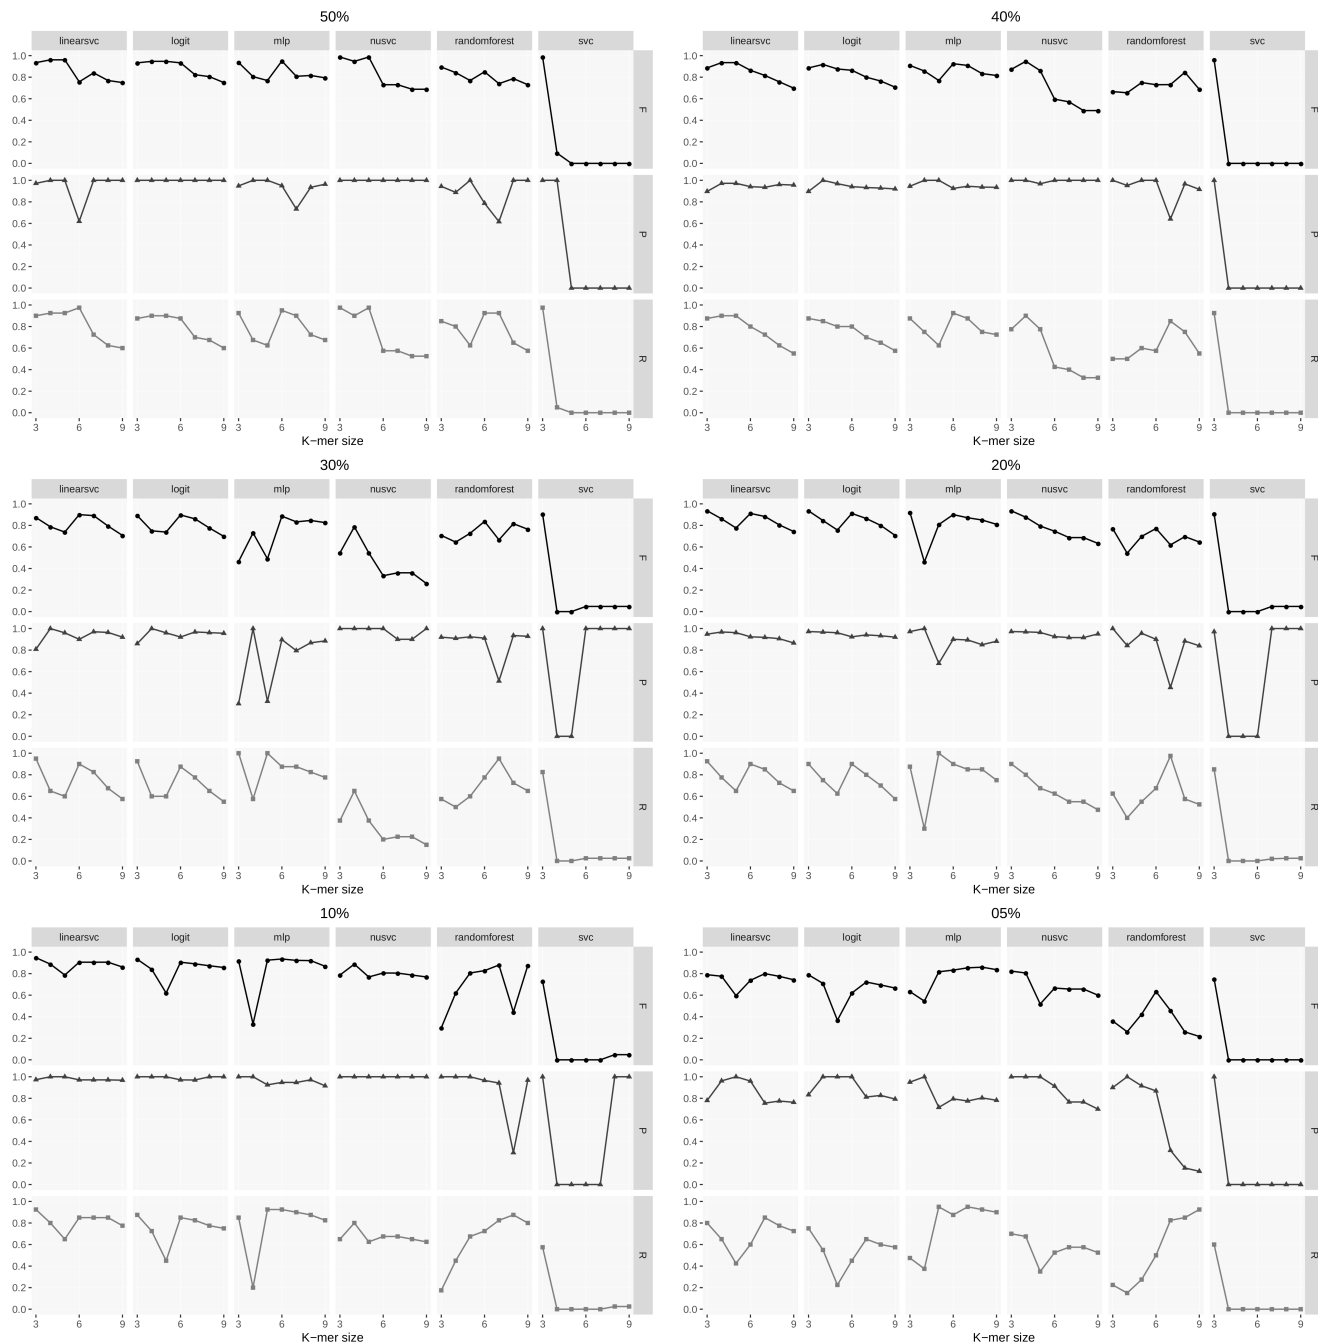

Supplementary Table 1: Distribution of positive and negative instances across fungal BGC datasets, from completely balanced (50% positive, 50% negative) to most imbalanced (05% positive, 95% negative). Each dataset was split between train and validation subsets during the training phase.

| Dataset distribution | Train |       | Validation |     | Total |       |
|----------------------|-------|-------|------------|-----|-------|-------|
|                      | Pos   | Neg   | Pos        | Neg | Pos   | Neg   |
| 50% - 50%            | 160   | 160   | 40         | 40  | 200   | 200   |
| 40% - 60%            | 160   | 240   | 40         | 60  | 200   | 300   |
| 30% - 70%            | 160   | 373   | 40         | 93  | 200   | 466   |
| 20% - 80%            | 160   | 640   | 40         | 160 | 200   | 800   |
| 10% - 90%            | 160   | 1,440 | 40         | 360 | 200   | 1,800 |
| 05% - 95%            | 160   | 3,040 | 40         | 760 | 200   | 3,800 |

Supplementary Table 2: Pfam domains annotated as *high* (usually present in BGCs) in our dataset positive instances.

| Pfam ID | Domain          | Pfam ID | Domain          |
|---------|-----------------|---------|-----------------|
| PF00389 | 2-Hacid_dh      | PF00378 | ECH_1           |
| PF01073 | 3Beta_HSD       | PF00487 | FA_desaturase   |
| PF00725 | 3HCDH           | PF00551 | Formyl_trans_N  |
| PF00583 | Acetyltransf_1  | PF00368 | HMG-CoA_red     |
| PF01648 | ACPS            | PF16197 | KAsynt_C_assoc  |
| PF00698 | Acyl.transf_1   | PF00109 | ketoacyl-synt   |
| PF13561 | adh_short_C2    | PF02801 | Ketoacyl-synt_C |
| PF00578 | AhpC-TSA        | PF08659 | KR              |
| PF00596 | Aldolase_II     | PF00753 | Lactamase_B     |
| PF01063 | Aminotran_4     | PF00657 | Lipase_GDSL     |
| PF00501 | AMP-binding     | PF12013 | OrsD            |
| PF08031 | BBE             | PF00550 | PP-binding      |
| PF00144 | Beta-lactamase  | PF00432 | Prenyltrans     |
| PF00199 | Catalase        | PF14765 | PS-DH           |
| PF00135 | COesterase      | PF16073 | SAT             |
| PF00668 | Condensation    | PF00975 | Thioesterase    |
| PF00394 | Cu-oxidase      | PF06330 | TRI5            |
| PF01041 | DegT_DnrJ_EryC1 | PF08195 | TRI9            |
| PF14226 | DIOX_N          | PF11991 | Trp_DMAT        |
| PF01738 | DLH             | PF01040 | UbiA            |

Supplementary Table 3: Pfam domains annotated as *medium* (usually present, but not limited to BGCs) in our dataset positive instances.

| Pfam ID | Domain          | Pfam ID | Domain          | Pfam ID  | Domain          |
|---------|-----------------|---------|-----------------|----------|-----------------|
| PF02826 | 2-Hacid_dh_C    | PF00970 | FAD_binding_6   | PF00891  | Methyltransf_2  |
| PF10014 | 2OG-Fe_Oxy_2    | PF12831 | FAD_oxidored    | PF05050  | Methyltransf_21 |
| PF03171 | 2OG-FeII_Oxy    | PF18325 | Fas_alpha_ACP   | PF13489  | Methyltransf_23 |
| PF02737 | 3HCDH_N         | PF18314 | FAS_I_H         | PF13649  | Methyltransf_25 |
| PF13622 | 4HBT_3          | PF17951 | FAS_meander     | PF13679  | Methyltransf_32 |
| PF13520 | AA_permease_2   | PF17828 | FAS_N           | PF10017  | Methyltransf_33 |
| PF00664 | ABC_membrane    | PF00465 | Fe-ADH          | PF07690  | MFS_1           |
| PF00005 | ABC_tran        | PF01613 | Flavin_Reduct   | PF00153  | Mito_carr       |
| PF03109 | ABC1            | PF00258 | Flavodoxin_1    | PF03972  | MmgE_PrpD       |
| PF01061 | ABC2_membrane   | PF01070 | FMN_dh          | PF00175  | NAD_binding_1   |
| PF07859 | Abhydrolase_3   | PF00743 | FMO-like        | PF13460  | NAD_binding_10  |
| PF08386 | Abhydrolase_4   | PF03959 | FSH1            | PF07993  | NAD_binding_4   |
| PF12697 | Abhydrolase_6   | PF04082 | Fungal_trans    | PF08030  | NAD_binding_6   |
| PF00330 | Aconitase       | PF11951 | Fungal_trans_2  | PF13450  | NAD_binding_8   |
| PF00694 | Aconitase_C     | PF01019 | G_glu_transpept | PF05368  | NmrA            |
| PF00441 | Acyl-CoA_dh_1   | PF00117 | GATase          | PF03169  | OPT             |
| PF01553 | Acyltransferase | PF01408 | GFO_IDH_MocA    | PF02784  | Orn_Arg_deC_N   |
| PF08240 | ADH_N           | PF01341 | Glyco_hydro_6   | PF00724  | Oxidored_FM_N   |
| PF00106 | adh_short       | PF13692 | Glyco_trans_1_4 | PF00067  | p450            |
| PF00107 | ADH_zinc_N      | PF13632 | Glyco_trans_2_3 | PF04389  | Peptidase_M28   |
| PF13602 | ADH_zinc_N_2    | PF13579 | Glyco_trans_4_4 | PF01432  | Peptidase_M3    |
| PF08493 | AflR            | PF13439 | Glyco_transf_4  | PF01435  | Peptidase_M48   |
| PF00171 | Aldedh          | PF00534 | Glycos_transf_1 | PF02129  | Peptidase_S15   |
| PF00248 | Aldo_ket_red    | PF00535 | Glycos_transf_2 | PF03572  | Peptidase_S41   |
| PF01425 | Amidase         | PF00903 | Glyoxalase      | PF00082  | Peptidase_S8    |
| PF01979 | Amidohydro_1    | PF05199 | GMC_oxred_C     | PF08530  | PepX_C          |
| PF04909 | Amidohydro_2    | PF00732 | GMC_oxred_N     | PF01328  | Peroxidase_2    |
| PF01593 | Amino_oxidase   | PF00043 | GST_C           | PF07976  | Phe_hydrox_dim  |
| PF00155 | Aminotran_1_2   | PF02798 | GST_N           | PF05721  | PhyH            |
| PF00202 | Aminotran_3     | PF13417 | GST_N_3         | PF00348  | polyprenyl_synt |
| PF00266 | Aminotran_5     | PF08759 | GT-D            | PF00484  | Pro_CA          |
| PF12796 | Ank_2           | PF13419 | HAD_2           | PF01619  | Pro_dh          |
| PF08546 | ApbA_C          | PF00372 | Hemocyanin_M    | PF04303  | PrpF            |
| PF00026 | Asp             | PF00132 | Hexapep         | PF07992  | Pyr_redux_2     |
| PF01212 | Beta_elim_lyase | PF00010 | HLH             | PF13738  | Pyr_redux_3     |
| PF00170 | bZIP_1          | PF00682 | HMGL-like       | PF14027  | Questin_oxidase |
| PF00571 | CBS             | PF18558 | HTH_51          | PF04055  | Radical_SAM     |
| PF00285 | Citrate_synt    | PF00702 | Hydrolase       | PF00581  | Rhodanese       |
| PF01179 | Cu_amine_oxid   | PF12146 | Hydrolase_4     | PF00355  | Rieske          |
| PF02727 | Cu_amine_oxidN2 | PF13344 | Hydrolase_6     | PF02982  | Scytalone_dh    |
| PF07731 | Cu-oxidase_2    | PF01231 | IDO             | PF13243  | SQHop_cyclase_C |
| PF07732 | Cu-oxidase_3    | PF00478 | IMPDH           | PF13249  | SQHop_cyclase_N |
| PF00173 | Cyt-b5          | PF00180 | Iso_dh          | PF08498  | Sterol_MT_C     |
| PF01266 | DAO             | PF00857 | Isochorismatase | PF02668  | TauD            |
| PF01323 | DSBA            | PF12706 | Lactamase_B_2   | PF00205  | TPP_enzyme_M    |
| PF08354 | DUF1729         | PF02866 | Ldh_1_C         | PF02458  | Transferase     |
| PF08592 | DUF1772         | PF00056 | Ldh_1_N         | PF06609  | TRI12           |
| PF06441 | EHN             | PF02900 | LigB            | PF07428  | Tri3            |
| PF01370 | Epimerase       | PF13472 | Lipase_GDSL_2   | PF04820  | Trp_halogenase  |
| PF07110 | EthD            | PF00206 | Lyase_1         | PF00264  | Tyrosinase      |
| PF03807 | F420_oxidored   | PF00221 | Lyase_aromatic  | PF01977  | UbiD            |
| PF04116 | FA_hydroxylase  | PF13452 | MaoC_dehydrat_N | PF00201  | UDPGT           |
| PF00667 | FAD_binding_1   | PF01575 | MaoC_dehydratas | PF08325  | WLM             |
| PF00890 | FAD_binding_2   | PF13813 | MBOAT_2         | PF00096  | zf-C2H2         |
| PF01494 | FAD_binding_3   | PF08241 | Methyltransf_11 | PF00098  | zf-CCHC         |
| PF01565 | FAD_binding_4   | PF08242 | Methyltransf_12 | PF001728 | Zn_clus         |

Supplementary Table 4: Unique features per training dataset distribution from completely balanced (50% positive, 50% negative) to most imbalanced (05% positive, 95% negative). Number of unique features (#) and feature percentage (%) is shown per each feature type for the total number of features in each dataset. K-mer features are shown for  $K = 6$ , the best performing  $K$  value in our study.

| Dataset distribution | K-mers (K=6) |         | Pfam domains |        | GO terms |        | Total     |
|----------------------|--------------|---------|--------------|--------|----------|--------|-----------|
|                      | #            | %       | #            | %      | #        | %      | #         |
| 50% - 50%            | 45,874       | (95.41) | 1,866        | (3.88) | 341      | (0.71) | 48,081    |
| 40% - 60%            | 59,040       | (96.59) | 2,370        | (3.87) | 286      | (0.46) | 61,124    |
| 30% - 70%            | 80,604       | (96.17) | 2,885        | (3.44) | 323      | (0.38) | 83,812    |
| 20% - 80%            | 160,750      | (97.38) | 3,975        | (2.41) | 340      | (0.20) | 165,065   |
| 10% - 90%            | 559,708      | (98.61) | 7,524        | (1.33) | 354      | (0.06) | 567,586   |
| 05% - 95%            | 1,826,067    | (98.97) | 18,307       | (0.99) | 562      | (0.03) | 1,844,936 |

Supplementary Table 5: Validation performance on fixed train and validation sets per classifier. Models were built using all feature types combined.

| Dataset | Classifier | P     | R     | F-m   | Average F-m  |
|---------|------------|-------|-------|-------|--------------|
| 50-50%  | lsvc       | 1     | 0.925 | 0.961 | <b>0.755</b> |
| 50-50%  | logit      | 1     | 0.925 | 0.961 | <b>0.755</b> |
| 40-60%  | mlp        | 0.951 | 0.975 | 0.962 | 0.715        |
| 30-70%  | logit      | 0.947 | 0.9   | 0.923 | 0.693        |
| 20-80%  | lsvc       | 0.925 | 0.925 | 0.925 | 0.732        |
| 20-80%  | mlp        | 0.925 | 0.925 | 0.925 | 0.732        |
| 10-90%  | mlp        | 0.948 | 0.925 | 0.936 | 0.738        |
| 05-95%  | lsvc       | 0.941 | 0.8   | 0.864 | 0.655        |

Supplementary Table 6: Validation performance on 5-fold CV per classifier on the completely balanced (50% positive, 50% negative) dataset. Models were built using all feature types combined.

| Dataset | Classifier | P     | R     | F-m   |
|---------|------------|-------|-------|-------|
| 50-50%  | lsvc       | 0.934 | 0.925 | 0.929 |
| 50-50%  | logit      | 0.922 | 0.935 | 0.928 |
| 50-50%  | mlp        | 0.948 | 0.910 | 0.928 |
| 50-50%  | nusvc      | 0.708 | 0.750 | 0.723 |
| 50-50%  | randomf    | 0.944 | 0.900 | 0.919 |
| 50-50%  | svc        | 0.911 | 0.900 | 0.904 |

Supplementary Table 7: DeepBGC original and fungal optimized hyperparameters applied during evaluation

| <b>Parameter</b> | <b>Original</b>                  | <b>Fungal</b>                    |
|------------------|----------------------------------|----------------------------------|
| batch_size       | 64                               | 16                               |
| hidden_size      | 128                              | 128                              |
| timesteps        | 256                              | 256                              |
| num_epochs       | 328                              | 50                               |
| dropout          | 0.2                              | 0.2                              |
| optimizer        | adam                             | adam                             |
| learning_rate    | 1e-4                             | 1e-4                             |
| loss             | weighted binary<br>cross-entropy | weighted binary<br>cross-entropy |

Supplementary Table 8: TOUCAN best performing hyperparameters to maximize F-m for each classifier.

|                |                                                                                                              |
|----------------|--------------------------------------------------------------------------------------------------------------|
| <b>lsvc</b>    | C = 0.01, loss = squared_hinge, penalty = l2                                                                 |
| <b>logit</b>   | penalty = l1, C=10, solver = saga                                                                            |
| <b>mlp</b>     | activation = relu, batch_size = 256, hidden_layer_sizes= 256,<br>learning_rate = 'adaptive', solver = 'adam' |
| <b>nusvc</b>   | coef0 = 0.01, gamma = 0.01, kernel = sigmoid                                                                 |
| <b>randomf</b> | bootstrap = False, criterion = entropy, max_features= log2,<br>n_estimators = 1000                           |
| <b>svc</b>     | C = 100, gamma = 0.001, kernel = rbf                                                                         |
